# Supplementary material for: Role of ZrO2 in TiO2 composites with rGO as an electron mediator to enhance the photocatalytic activity for the photodegradation of methylene blue
Source: Royal Society of Chemistry journal article supplement (doi:10.1039/d2ma00754a), 2022-01-01
Supplement: d2ma00754a1.pdf [file d2ma00754a1.pdf]

## Electronic Supplementary Information (ESI)

### Role of ZrO<sub>2</sub> in TiO<sub>2</sub> composites with rGO as an electron mediator for enhancing the photocatalytic activity for the photodegradation of methylene blue

Lihini Jayasinghe,<sup>a</sup> Vimukthi Jayaweera,<sup>a</sup> Nuwan de Silva,<sup>\*a</sup> and Azeez M Mubarak<sup>a</sup>

<sup>a</sup>Sri Lanka Institute of Nanotechnology, Nanotechnology and Science Park, Mahenwatte, Pitipana, Homagama, Sri Lanka.

Corresponding Author: Nuwan de Silva, [nuwans@slintec.lk](mailto:nuwans@slintec.lk), Tel: +94 11 4650524

#### Characterization of GT composite using XPS

The survey spectrum and narrow scans of GT are shown in **Fig. S1**. The reduction of GO to rGO is confirmed by observing the decrease in C 1s and O 1s peaks intensity (**Fig. S1b**)<sup>1</sup>. The rGO-TiO<sub>2</sub> interactions in the composite were also investigated using XPS. The survey spectra (**Fig. S1a**) clearly indicate the presence of, C 1s, O 1s, and Ti 2p species on the surface of composite proving the successful composite of GT. The deconvoluted C1s XPS spectrum (**Fig. S1b**) of the sample clearly shows four types of carbon bonds, the C-C at 284.8 eV, C-O-C at 286.2 eV, Ti-O-C 288.4 eV and  $\pi$ - $\pi$  interactions at 289.6 eV.<sup>2-5</sup> The strong O 1s peak at 529.6 eV was related to Ti-C, as shown in **Fig. S1c**, the peak at 529.8 eV indicates the existence of the Ti-O-Ti bonds in GT.<sup>6, 7</sup> The presences of these peaks confirms the bond formation between TiO<sub>2</sub> and rGO.<sup>8, 9</sup> Overall, the XPS results suggest that the TiO<sub>2</sub> is chemically bound to rGO. The two strong characteristic peaks at 458.3 eV and 464.0 eV of Ti 2p as shown in **Fig. S1d** are attributed to Ti 2p<sub>3/2</sub> and Ti 2p<sub>1/2</sub> respectively which supports the binding energies of Ti<sup>4+</sup> in the TiO<sub>2</sub> lattice.<sup>6, 10</sup>

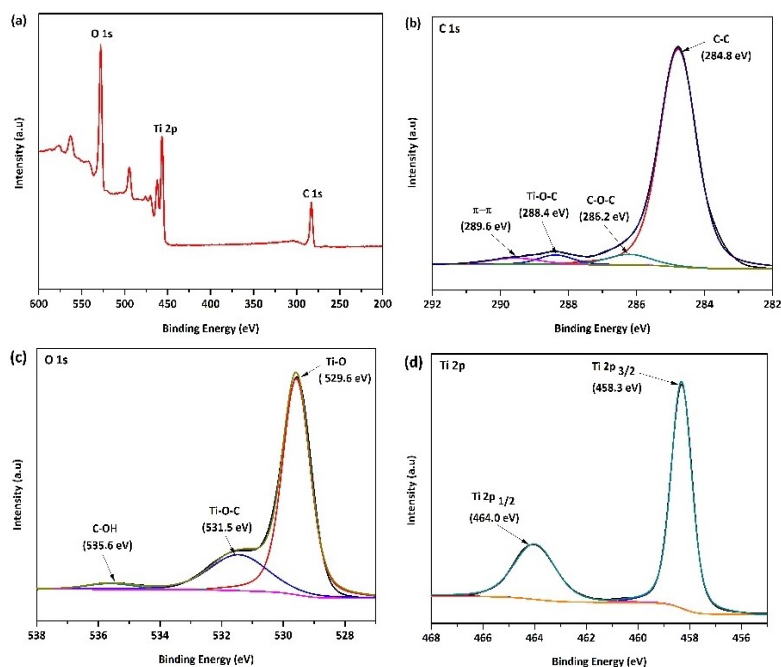

**Fig. S1** - XPS survey spectrum (a) of GT composite and its corresponding high-resolution XPS spectra of C 1s (b), O 1s (c), and Ti 2p (d).

## Pore analysis of TiO<sub>2</sub>, GT and GTZ-20 composites

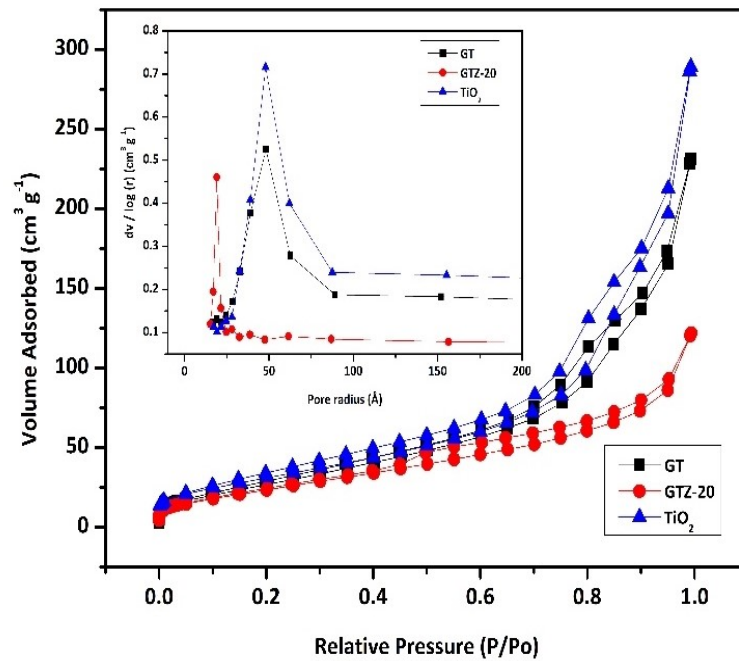

Fig. S2 - Nitrogen adsorption/desorption isotherms of TiO<sub>2</sub>, GT and GTZ-20. The inset shows their pore size distribution.

## Band gap estimation of TiO<sub>2</sub> and ZrO<sub>2</sub> metal oxides

The reflectance spectra were transformed to Kubelka–Munk coordinates (KM,  $\alpha$ ) and then Tauc's plot was constructed to estimate the band gaps of the commercially obtained titanium dioxide and zirconium (IV) oxide.<sup>11, 12</sup> The band gap values of TiO<sub>2</sub> and ZrO<sub>2</sub> were found to be 3.53 eV and 4.40 eV respectively, this further confirms the successful synthesis of GT and GTZ-X composites, as the band gap values of the synthesized composites are lower than their respective metal oxides.

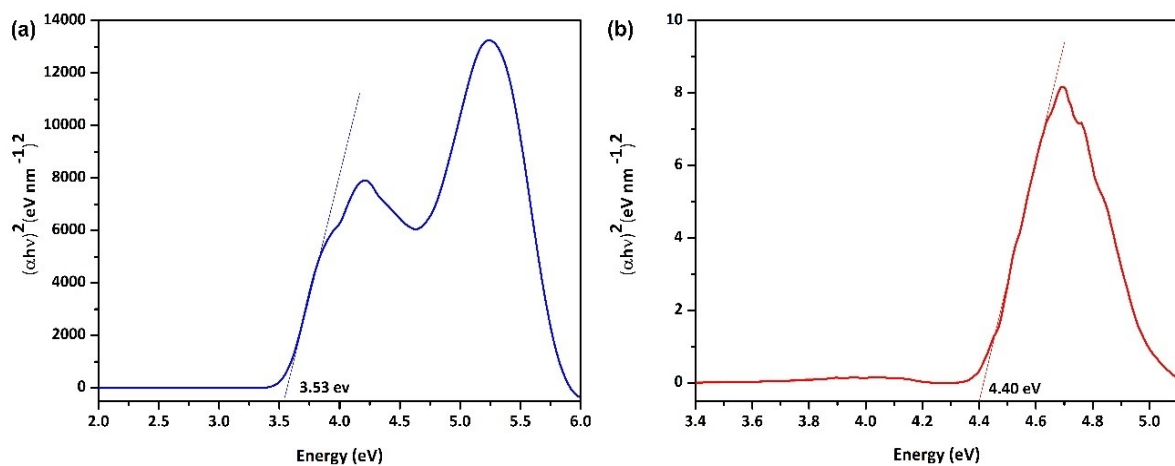

Fig. S3 - Band gap estimation using a Tauc plot of TiO<sub>2</sub> (a), and ZrO<sub>2</sub> (b).

## LC-MS Analysis of GT and GTZ-20

Methylene Blue and its products that were present in the solutions degraded by the samples, were separated and analyzed using LC-MS, and MS chromatograms were obtained as shown in Fig. S4.

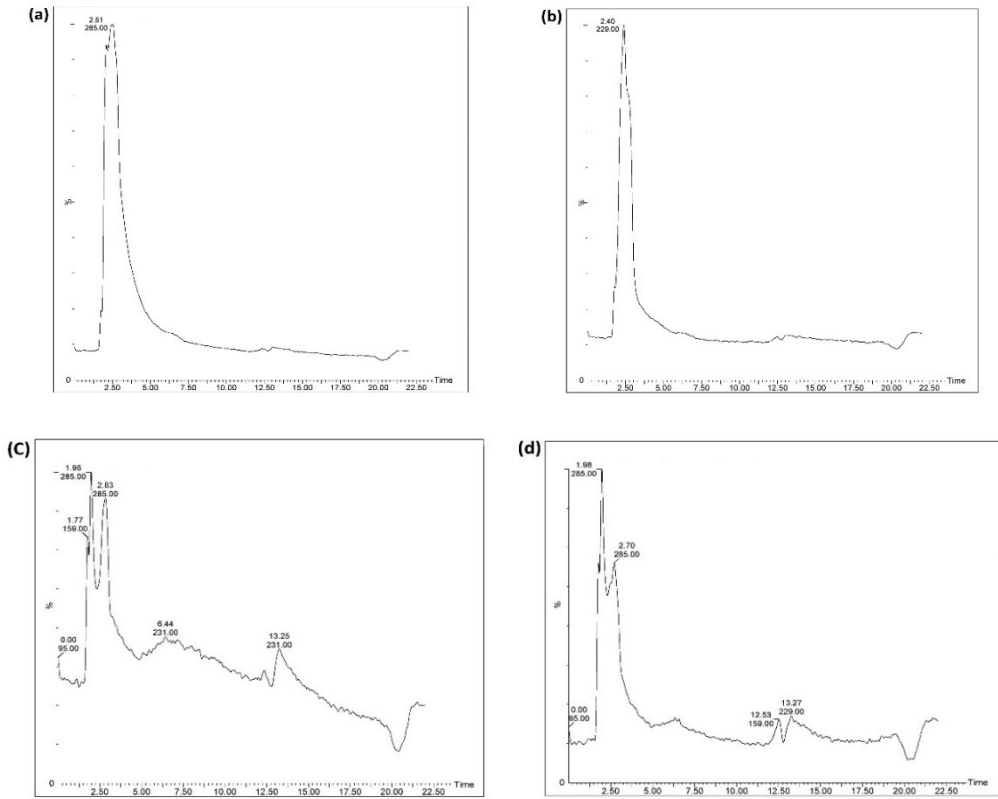

Fig. S4 - LC-MS chromatogram; of GT at 30 min (a), 100 min (b), GTZ-20 at 30 mins (c), and 100 min (d).

### First derivative analysis of photocatalytic data

It was shown that the adsorption-desorption equilibrium time was reached within the first 10 mins as shown in Fig. S5. However, in order to confirm the adsorption equilibrium a prolonged time of 30 min was determined as the optimum equilibrium time.

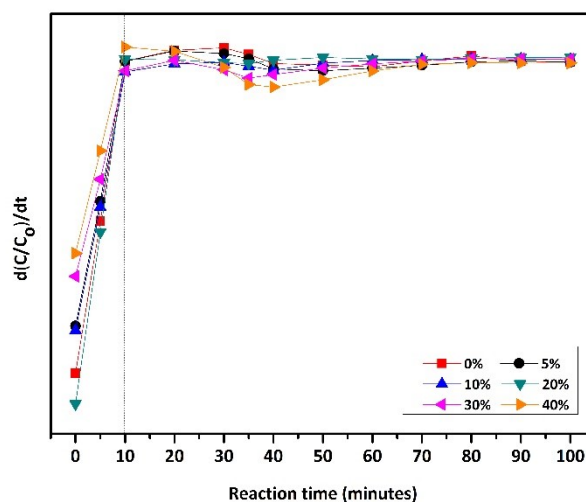

Fig. S5 - First derivative analysis of photocatalytic data to determine adsorption equilibrium.

### References

1. L. Gu, J. Wang, H. Cheng, Y. Zhao, L. Liu and X. Han, *ACS Appl. Mater. Interfaces*, 2013, **5**, 3085-3093.
2. H.-W. Tien, Y.-L. Huang, S.-Y. Yang, J.-Y. Wang and C.-C. M. Ma, *Carbon*, 2011, **49**, 1550-1560.
3. O. Akhavan and E. Ghaderi, *J. Phys. Chem. C*, 2009, DOI: <https://doi.org/10.1021/jp906325q>.
4. D. Yang, A. Velamakanni, G. Bozoklu, S. Park, M. Stoller, R. D. Piner, S. Stankovich, I. Jung, D. A. Field, C. A. Ventrice and R. S. Ruoff, *Carbon*, 2009, **47**, 145-152.
5. R. A. Rakkesh, D. Durgalakshmi and S. Balakumar, *Journal of Materials Chemistry C*, 2014, **2**, 6827.
6. P. Xiong, S. Xu, T. Yang and K. Jing, *ACS omega*, 2021, **6**, 28813-28827.
7. S. Gong, Z. Jiang, S. Zhu, J. Fan, Q. Xu and Y. Min, *J. Nanoparticle Res.*, 2018, **20**.
8. X. Fu, L. A. Clark, Q. Yang and M. A. Anderson, *Environ. Sci. Technol.*, 1996, **30**, 647-653.
9. H.-B. Kim and D.-J. Jang, *CrystEngComm.*, 2015, **17**, 3325-3332.
10. K. Kim, A. Razzaq, S. Sorcar, Y. Park, C. A. Grimes and S.-I. In, *RSC Advances*, 2016, **6**, 38964-38971.
11. K. Mamulova Kutlakova, J. Tokarsky, P. Kovar, S. Vojteskova, A. Kovarova, B. Smetana, J. Kukutschova, P. Capkova and V. Matejka, *Journal of hazardous materials*, 2011, **188**, 212-220.
12. P. Makula, M. Pacia and W. Macyk, *The journal of physical chemistry letters*, 2018, **9**, 6814-6817.
